# Supplementary material
Source: PubMed Central journal article supplement (PMC2638485)
Supplement: ern097_1.pdf [file ern097_1.pdf]

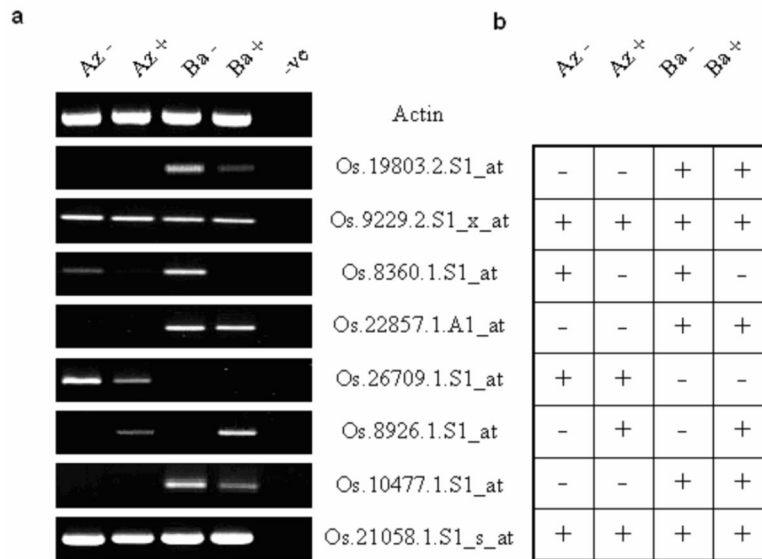

**Figure. S1.** RT-PCR confirmation of array results for actin and eight genes chosen to represent contrasting patterns of differential expression from the array data.
